# Supplementary material
Source: MDPI journal article supplement (https://www.mdpi.com/2073-4433/12/11/1517)
Supplement: s1 [file s1]

**TableS1.** Statistics analysis for meteorological parameters and pollutants during the the study period.

| <b>Species</b>            | <b>2018</b> | <b>2019</b> | <b>2020</b> | <b>Average</b> |
|---------------------------|-------------|-------------|-------------|----------------|
| NO/( ppbv )               | 4.3         | 6           | 5.2         | 5.1            |
| CO/( ppbv )               | 1.5         | 1.6         | 1.7         | 1.6            |
| SO <sub>2</sub> /( ppbv ) | 1.8         | 2           | 3.3         | 2              |
| O <sub>3</sub> /(ppbv)    | 61.9        | 75.5        | 66.4        | 68.2           |
| NO <sub>2</sub> /(ppbv )  | 25.4        | 19.4        | 15          | 20.3           |
| TVOC/( ppbv )             | 13          | 34.7        | 17.8        | 21.8           |
| RH/(%)                    | 66.6        | 61.4        | 65.4        | 64.4           |
| WS/(m/s)                  | 1.7         | 1.6         | 1.5         | 1.6            |
| TSRI/(w/m <sup>2</sup> )  | 348.6       | 378.7       | 375.9       | 367.5          |
| P/(KPa)                   | 100.7       | 100.7       | 100.8       | 100.7          |
| Pre/(mm)                  | 0.1         | 0.1         | 0.1         | 0.1            |
| Vis/(km)                  | 26.9        | 32.3        | 29.8        | 29.6           |
| T/(°C)                    | 24.3        | 23.6        | 23.2        | 23.7           |

Table S2 O<sub>3</sub> episodes between 1th April, and 31th August from 2018 to 2020

| Year | Haze-episodes | Date                      | Duration | Average concentration | Heavy pollution duration | Peak concentration |
|------|---------------|---------------------------|----------|-----------------------|--------------------------|--------------------|
| 2018 | 1             | 2th April                 | 1d       | 108                   | 5h                       | 191                |
|      | 2             | 1th June to 2th June      | 2d       | 101                   | 15h                      | 248                |
|      | 3             | 4th June to 6th June      | 3d       | 129                   | 19h                      | 239                |
|      | 4             | 12th June                 | 1d       | 114                   | 7h                       | 205                |
|      | 5             | 14th June                 | 1d       | 95                    | 4h                       | 194                |
|      | 6             | 16th June                 | 1d       | 114                   | 6h                       | 190                |
|      | 7             | 18th June                 | 1d       | 118                   | 8h                       | 206                |
|      | 8             | 4th July to 5th July      | 2d       | 98                    | 11h                      | 191                |
|      | 9             | 12th July                 | 1d       | 84                    | 6h                       | 208                |
|      | 10            | 19th July                 | 1d       | 120                   | 6h                       | 228                |
|      | 11            | 21th July to 22th July    | 2d       | 138                   | 22h                      | 268                |
|      | 12            | 28th July                 | 1d       | 106                   | 5h                       | 184                |
|      | 13            | 30th July to 4th August   | 6d       | 108                   | 45h                      | 250                |
|      | 14            | 9th August to 13th August | 5d       | 125                   | 43h                      | 344                |
|      | 15            | 17th August               | 1d       | 94                    | 7h                       | 205                |
| 2019 | 1             | 16th May                  | 1d       | 114                   | 4h                       | 184                |
|      | 2             | 23th May                  | 1d       | 95                    | 5h                       | 210                |
|      | 3             | 29th May                  | 1d       | 104                   | 6h                       | 213                |
|      | 4             | 2th June                  | 1d       | 113                   | 6h                       | 177                |
|      | 5             | 12th June                 | 1d       | 122                   | 9h                       | 213                |
|      | 6             | 14th June                 | 1d       | 113                   | 9h                       | 239                |
|      | 7             | 18th June                 | 1d       | 90                    | 3h                       | 194                |
|      | 8             | 20th June                 | 1d       | 109                   | 6h                       | 258                |
|      | 9             | 22th June                 | 1d       | 139                   | 7h                       | 199                |
|      | 10            | 24th June to 25th June    | 2d       | 120                   | 17h                      | 222                |
|      | 11            | 27th June                 | 1d       | 110                   | 7h                       | 184                |
|      | 12            | 2th July to 3th July      | 2d       | 117                   | 12h                      | 198                |
|      | 13            | 12th July                 | 1d       | 114                   | 9h                       | 193                |
|      | 14            | 14th July to 15th July    | 2d       | 114                   | 11h                      | 204                |

|      |    |                            |    |     |     |     |
|------|----|----------------------------|----|-----|-----|-----|
|      | 15 | 21th July to<br>28th July  | 8d | 121 | 57h | 245 |
|      | 16 | 31th July to<br>1th August | 2d | 127 | 17h | 235 |
|      | 17 | 8th August                 | 1d | 92  | 6h  | 178 |
| 2020 | 1  | 30th April to<br>1th May   | 2d | 117 | 12h | 208 |
|      | 2  | 7th June                   | 1d | 106 | 9h  | 211 |
|      | 3  | 13th June                  | 1d | 104 | 4h  | 167 |
|      | 4  | 15th June                  | 1d | 87  | 5h  | 190 |

Table S3 Estimated degree of freedom (Edf), degree of reference (Ref. df), P-value, F-value (which measures the relative importance of smoothed variable) for the smoothed variables in the GAM model.

| Year | Index     | Edf   | Ref.df | F      | P-value                |
|------|-----------|-------|--------|--------|------------------------|
| 2018 | vis       | 5.377 | 6.518  | 16.659 | $<2 \times 10^{-16}$   |
|      | RH        | 5.93  | 7.083  | 15.333 | $<2 \times 10^{-16}$   |
|      | NO        | 8.656 | 8.91   | 14.341 | $<2 \times 10^{-16}$   |
|      | T         | 8.077 | 8.629  | 13.104 | $<2 \times 10^{-16}$   |
|      | P         | 8.033 | 8.717  | 7.311  | $1.82 \times 10^{-9}$  |
|      | ws        | 7.782 | 8.612  | 6.846  | $1.58 \times 10^{-8}$  |
|      | CO        | 5.09  | 6.136  | 6.603  | $1.13 \times 10^{-6}$  |
|      | NO2       | 1     | 1      | 5.489  | 0.019778               |
|      | TSRI      | 7.951 | 8.683  | 4.101  | $5.09 \times 10^{-5}$  |
|      | Alkenes   | 6.056 | 7.032  | 3.677  | 0.000792               |
|      | SO2       | 7.74  | 8.579  | 2.979  | $1.86 \times 10^{-3}$  |
|      | acetylene | 8.114 | 8.758  | 2.609  | 0.006165               |
| 2019 | T         | 5.273 | 6.431  | 70.659 | $<2 \times 10^{-16}$   |
|      | NO2       | 8.016 | 8.73   | 22.872 | $<2 \times 10^{-16}$   |
|      | Wd        | 1     | 1      | 22.782 | $2.29 \times 10^{-6}$  |
|      | vis       | 2.749 | 3.422  | 21.959 | $1.66 \times 10^{-14}$ |
|      | RH        | 5.217 | 6.317  | 17.003 | $<2 \times 10^{-16}$   |
|      | TSRI      | 1     | 1      | 16.314 | $6.08 \times 10^{-5}$  |
|      | ws        | 3.251 | 4.104  | 13.781 | $7.17 \times 10^{-11}$ |
|      | NO        | 5.938 | 7.097  | 9.622  | $1.84 \times 10^{-11}$ |
|      | CO        | 4.009 | 5.021  | 8.529  | $7.88 \times 10^{-8}$  |
|      | Alkenes   | 2.24  | 2.755  | 4.692  | 0.00507                |
|      | pre       | 1.811 | 2.099  | 3.333  | 0.03321                |
|      | P         | 5.888 | 7.016  | 2.709  | $8.35 \times 10^{-3}$  |
| 2020 | T         | 6.963 | 8      | 81.806 | $<2 \times 10^{-16}$   |
|      | NO2       | 6.919 | 7.871  | 39.793 | $<2 \times 10^{-16}$   |
|      | vis       | 2.995 | 3.654  | 24.806 | $1.37 \times 10^{-13}$ |
|      | ws        | 1.7   | 2.126  | 24.382 | $1.90 \times 10^{-9}$  |
|      | acetylene | 1     | 1      | 11.068 | $1.37 \times 10^{-3}$  |
|      | Alkanes   | 8.897 | 8.989  | 7.916  | $1.38 \times 10^{-8}$  |
|      | TSRI      | 4.375 | 5.31   | 7.159  | $1.02 \times 10^{-5}$  |
|      | Aromatics | 6.906 | 7.924  | 5.742  | $7.62 \times 10^{-6}$  |

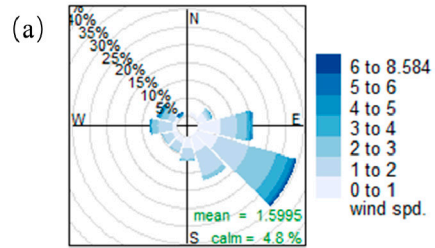

Frequency of counts by wind direction (%)

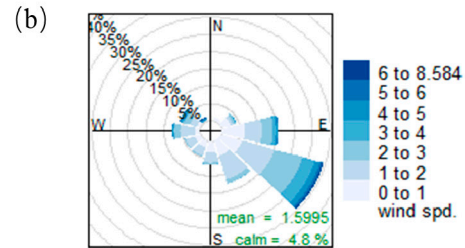

Frequency of counts by wind direction (%)

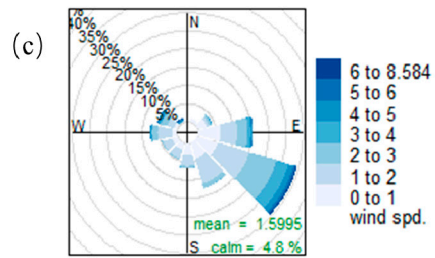

Frequency of counts by wind direction (%)

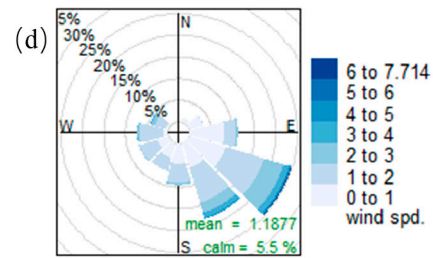

Frequency of counts by wind direction (%)

**Fig. S1.** Wind roses during study period in 2018(a),2019(b),2020(c) and during O<sub>3</sub> episodes from 2018 to 2020(d)

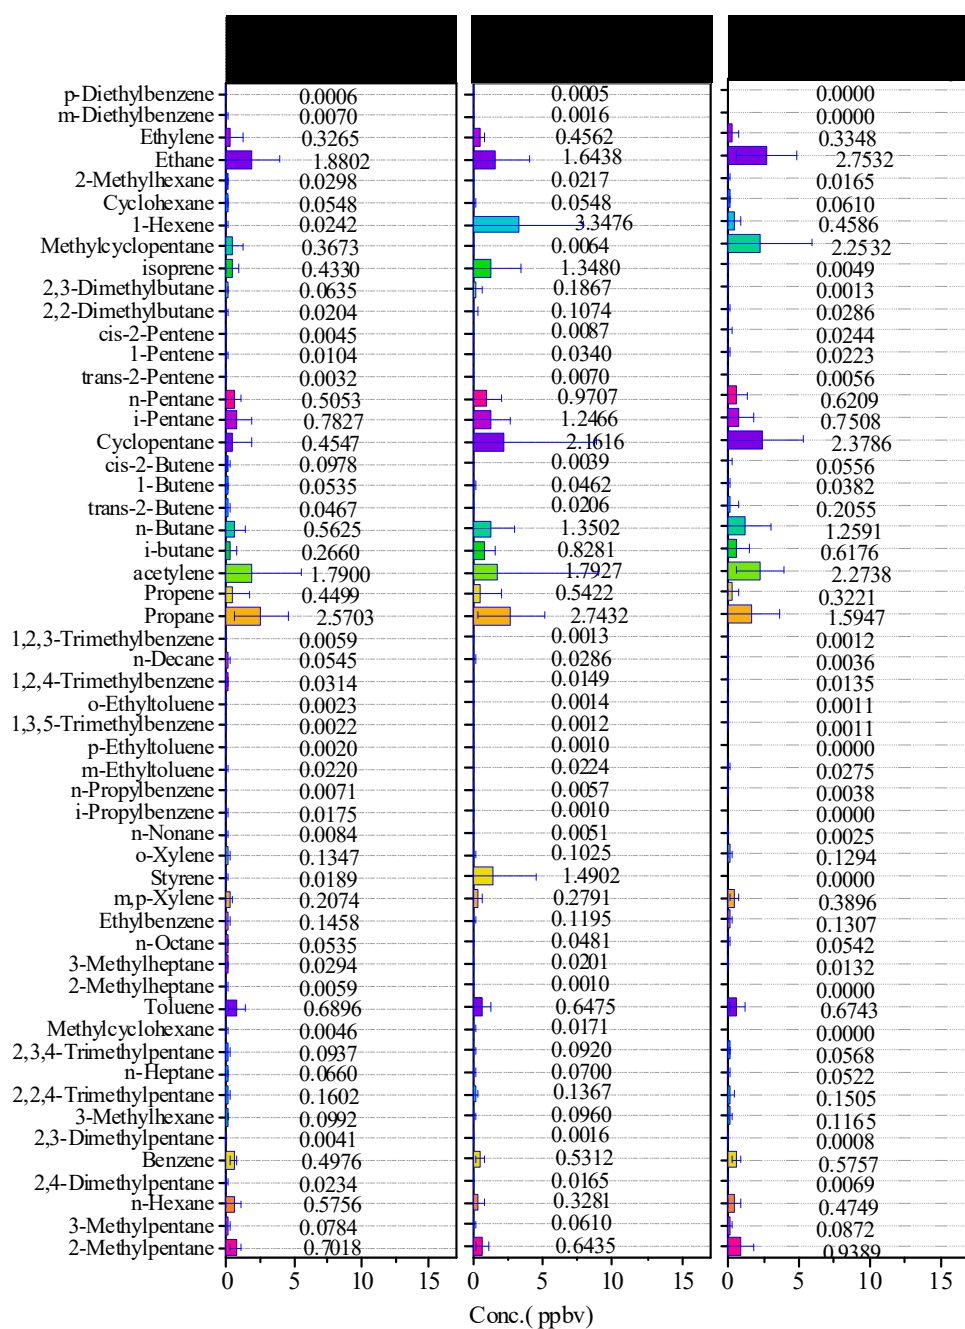

**Fig. S2** The mean concentrations of VOCs during the O<sub>3</sub> episodes in this study.

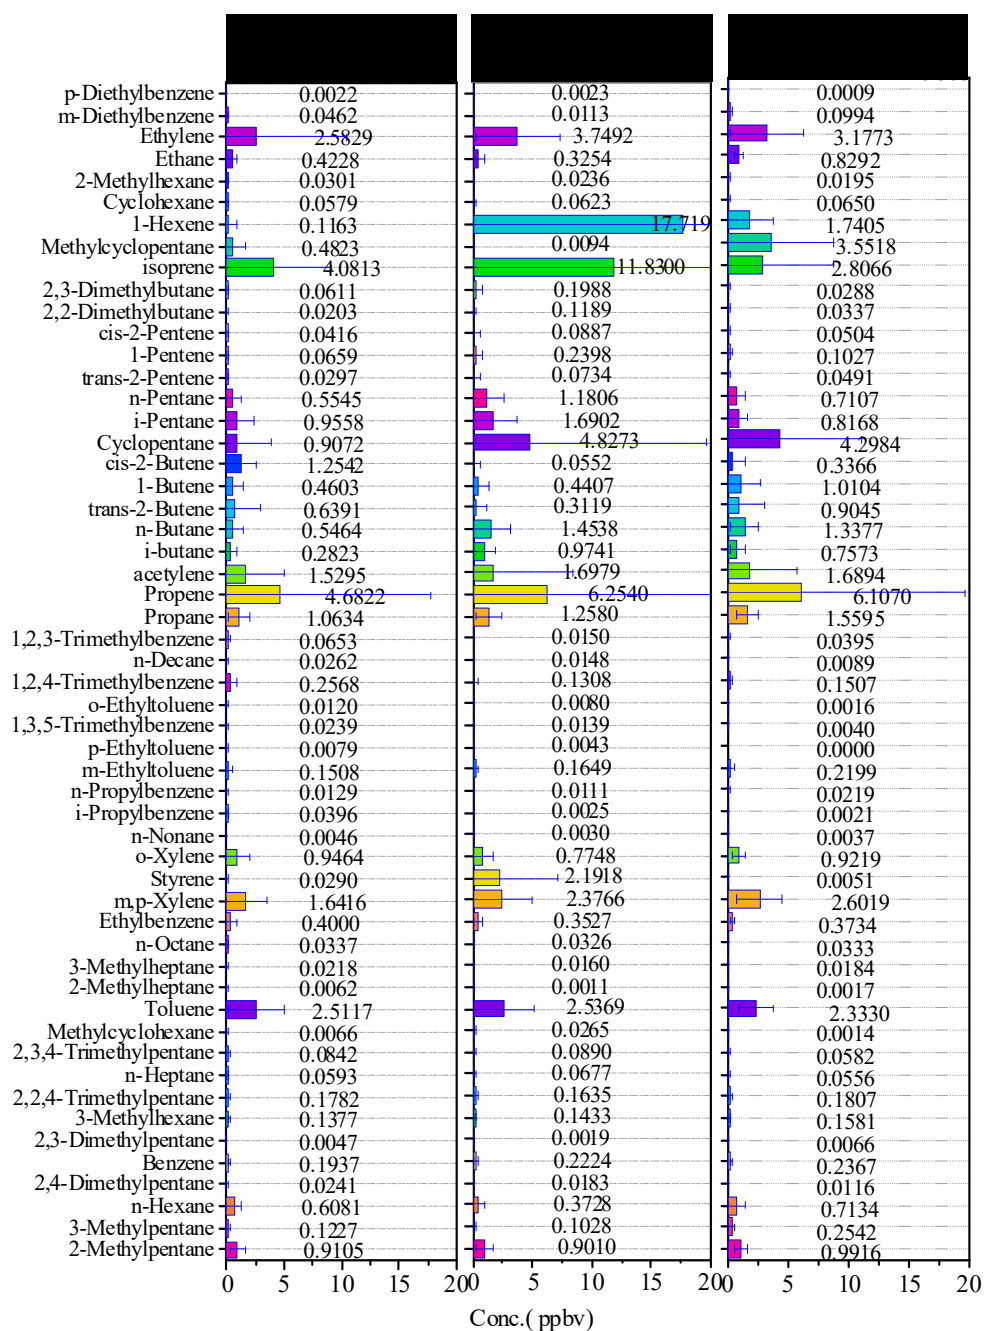

Fig. S3 The mean OFF during the O<sub>3</sub> episodes in this study.

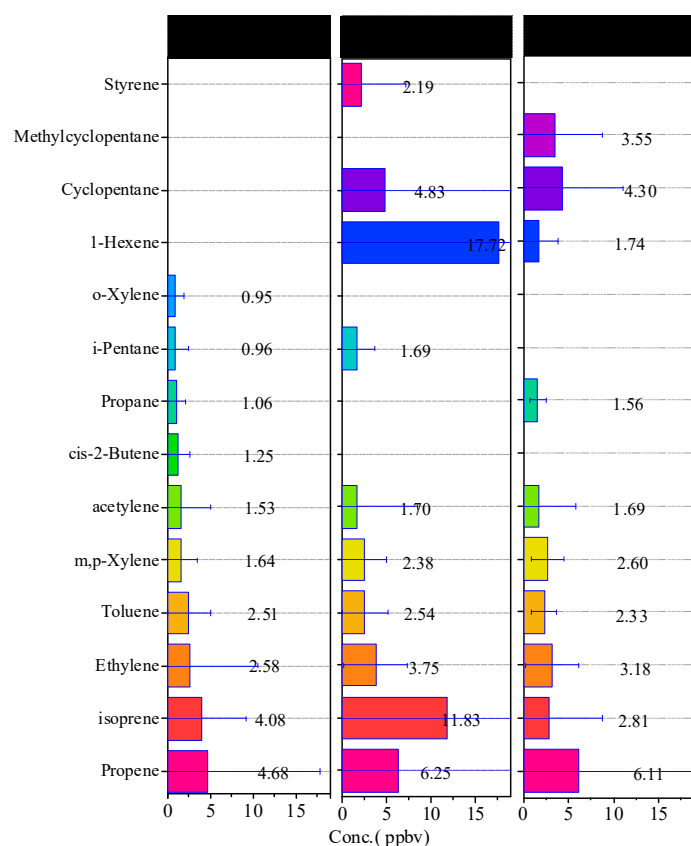

Fig. S4 TOP 10 OFP species in this study during O<sub>3</sub> episodes.

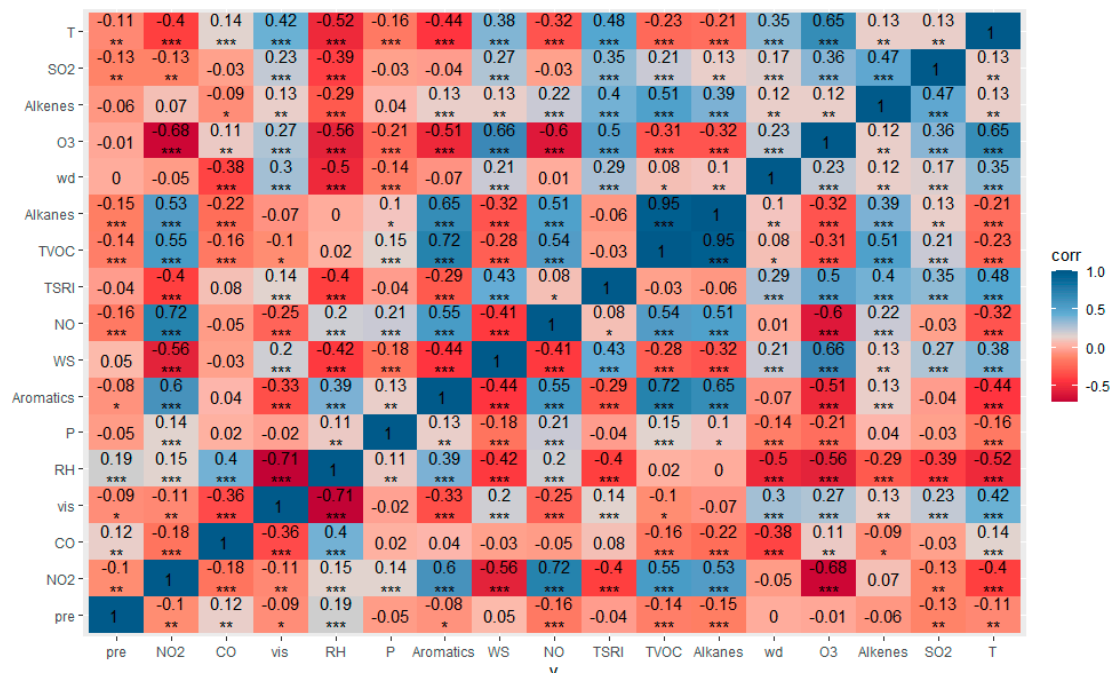

Fig. S5 The spearman correlation coefficients during O<sub>3</sub> episodes in 2018(\*\*\*) This indicates  $p < 0.001$ . \*\* This indicates  $p < 0.01$ . \* This indicates  $p < 0.05$ .)



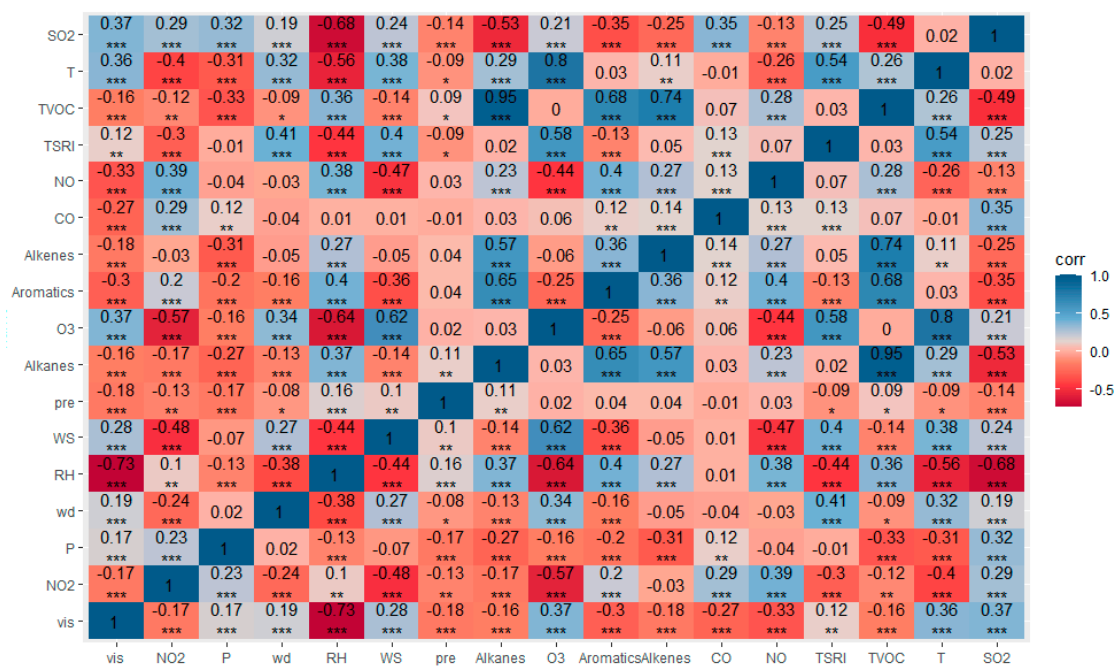

**Fig. S6** The spearman correlation coefficients during O<sub>3</sub> episodes in 2019(\*\***This** indicates  $p < 0.001$ .\*\* This indicates  $p < 0.01$ . \* This indicates  $p < 0.05$ .)

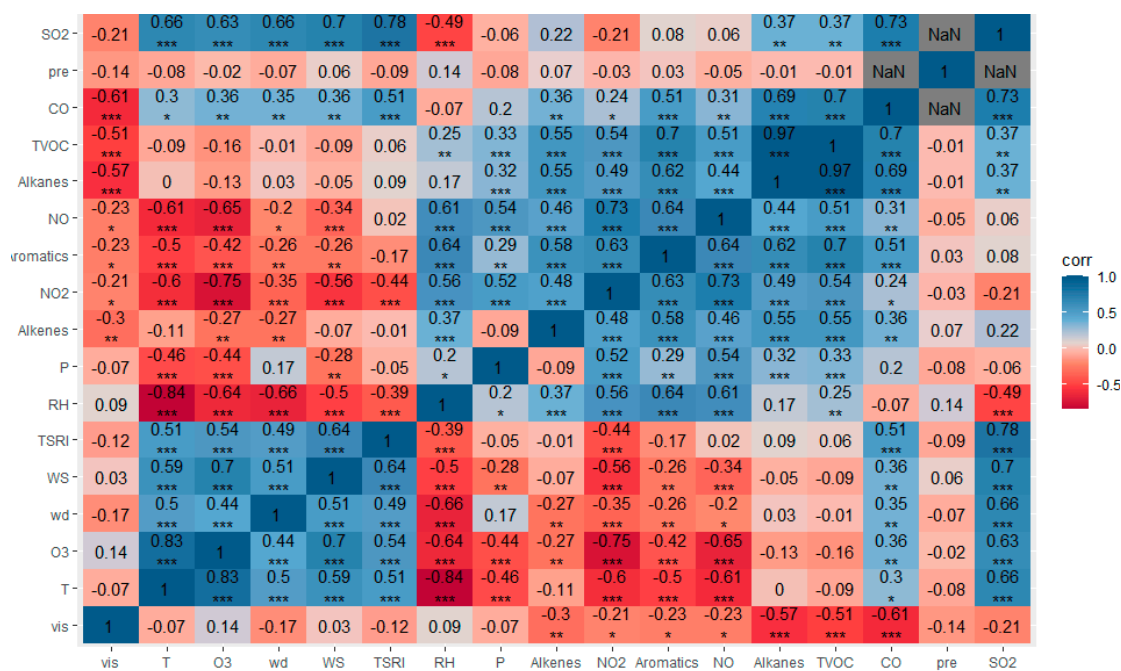

**Fig. S7** The spearman correlation coefficients during O<sub>3</sub> episodes in 2020(\*\***This** indicates  $p < 0.001$ .\*\* This indicates  $p < 0.01$ . \* This indicates  $p < 0.05$ .)

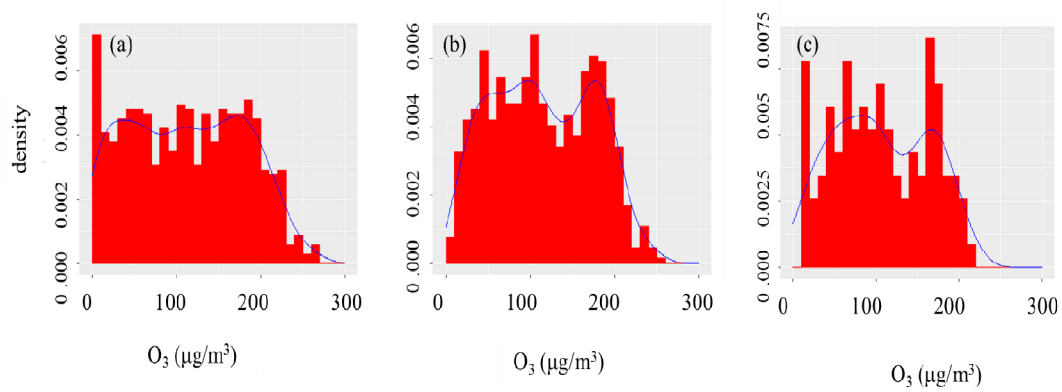

**Fig. S8** Density plot of  $O_3$  in 2018(a);2019(b);2020(c)

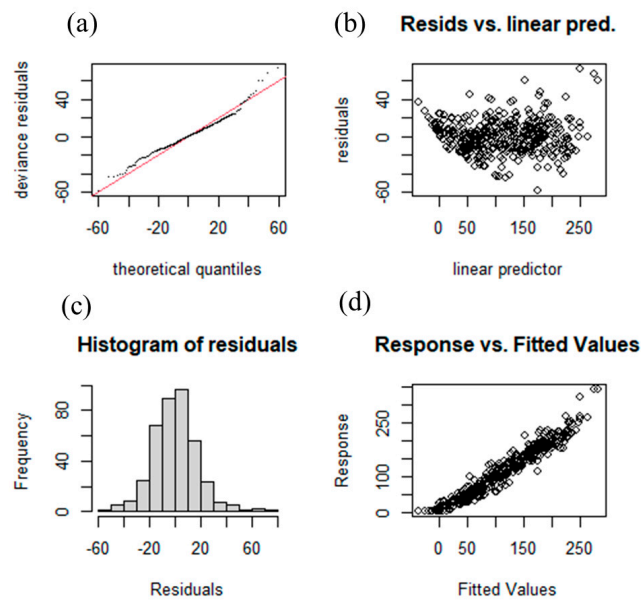

**Fig. S9** Residual error result test ((a) Residual QQ plot,(b) Residual histogram,(c) Scatter plot of residuals and predictions,(d) Scatter plot of observed and fitted values) in GAM model during  $O_3$  episodes in 2018

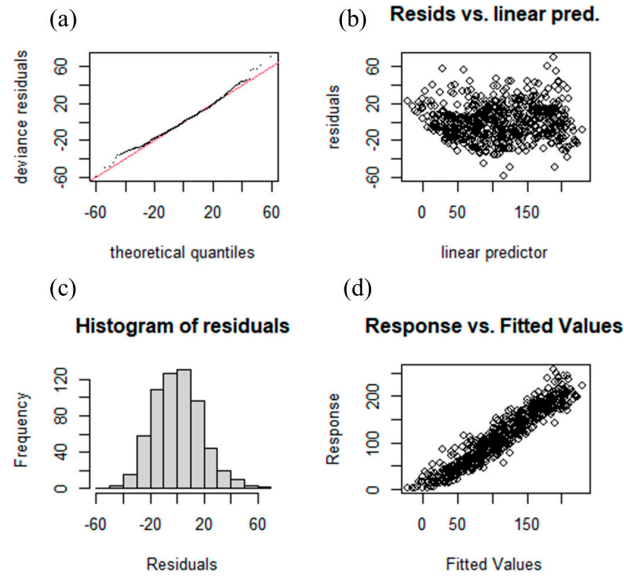

**Fig. S10** Residual error result test ((a) Residual QQ plot,(b) Residual histogram,(c) Scatter plot of residuals and predictions,(d) Scatter plot of observed and fitted values) in GAM model during O<sub>3</sub> episodes in 2019

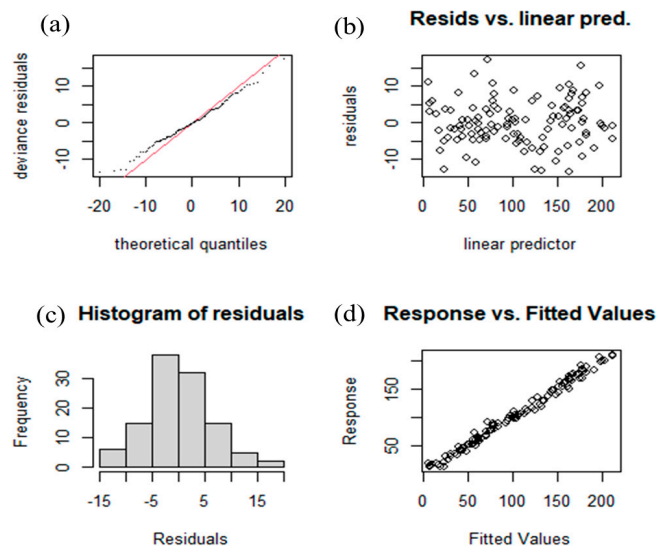

**Fig. S11** Residual error result test ((a) Residual QQ plot, (b) Residual histogram, (c) Scatter plot of residuals and predictions,(d) Scatter plot of observed and fitted values) in GAM model during O<sub>3</sub> episodes in 2020
